# Supplementary material
Source: Springer Nature journal article supplement (https://www.springermedizin.de/resource/supplementary/12889_2009_1954_MOESM4_ESM.pdf/9485450)
Supplement: MOESM4 [file 9485450]

## Pilot study / QUAN+QUAL

Procedures:

- Questionnaires; Semi-structured interviews; Observations; Document analysis

### Data collection

#### QUAN

##### Procedures

- Questionnaires
- Forms

##### Products

- Numeric data

#### qual

##### Procedures

- Open-ended questions
- Semi-structured interviews
- Extraction data from written sources

##### Products

- Data from open-ended questions
- Transcripts
- Memos issued from written sources
- Researchers' memos

### Data analysis

#### QUAN

##### Procedures

- Statistical procedures: descriptive, univariate, multilevel<sup>a</sup>, multivariate<sup>b</sup>
- Score construction

##### Products

- Inferential statistics
- Multilevel models
- Multivariate classification

#### qual

##### Procedures

- Coding
- Content analysis
- Grounded theory

##### Products

- Codes
- Themes/ Categories
- Organizational structures
- Case studies

Quantizing data

Qualitizing data

### Interpretation based on QUAN(qual) results

#### Procedures

- QUAN interpretation
- qual interpretation
- Validate Quantitized results by qual results
- Clarify QUAN results by qual results
- Contrast/compare QUAN and qual results

#### Products

- Generalization
- Prediction
- Interpretation of theory
